1 Mass Spectrometry Imaging of Hair Identifies Daily Maraviroc Adherence in HPTN 069/ACTG  
2 A5305

3

4 Elias P. Rosen<sup>a#</sup>, Nicole White<sup>a</sup>, William M. Gilliland Jr<sup>b</sup>, Roy R. Gerona<sup>c</sup>, Monica Gandhi<sup>d</sup>, K.  
5 Rivet Amico<sup>e</sup>, Kenneth H. Mayer<sup>f</sup>, Roy M. Gulick<sup>g</sup>, Angela DM Kashuba<sup>a</sup>

6

7 <sup>a</sup> Eshelman School of Pharmacy, University of North Carolina at Chapel Hill at Chapel Hill;  
8 Chapel Hill, North Carolina, United States

9 <sup>b</sup> Department of Chemistry, Furman University; Greenville, South Carolina, United States

10 <sup>c</sup> Department of Obstetrics, Gynecology and Reproductive Sciences, University of California San  
11 Francisco; San Francisco, CA, United States

12 <sup>d</sup> Department of Medicine, University of California San Francisco; San Francisco, California,  
13 United States

14 <sup>e</sup> School of Public Health, University of Michigan; Ann Arbor, Michigan, United States

15 <sup>f</sup> Fenway Health, Department of Medicine, Beth Israel Deaconess Medical Center/Harvard  
16 Medical School; Boston, Massachusetts, United States

17 <sup>g</sup> Weill Cornell Medicine; New York, New York, United States

18

19 Running Head: Maraviroc Adherence Monitoring in Hair by MSI

20

21 <sup>#</sup>Address correspondence to Elias Rosen, [eli@unc.edu](mailto:eli@unc.edu)

22

23 **Abstract**

24 Objective measures of adherence for antiretrovirals used as pre-exposure prophylaxis (PrEP) are  
25 critical for improving preventative efficacy in both clinical trials and real-world application.  
26 Current objective adherence measures either reflect only recent behavior (eg days for plasma or  
27 urine) or cumulative behavior (eg months for dried blood spots). We measured the accumulation  
28 of the antiretroviral drug maraviroc (MVC) in hair strands by infrared matrix-assisted laser  
29 desorption electrospray ionization (IR-MALDESI) mass spectrometry imaging (MSI) to evaluate  
30 adherence behavior longitudinally at high temporal resolution. An MSI threshold for classifying  
31 daily adherence was established using clinical samples from healthy volunteers following directly  
32 observed dosing of 1 to 7 doses MVC/week. We then used the benchmarked MSI assay to classify  
33 adherence to MVC-based PrEP regimens in hair samples collected throughout the 49-week  
34 HPTN069/ACTGA5305 study. We found that only ~32% of investigated hair samples collected  
35 during the study's active dosing period showed consistent daily PrEP adherence throughout a  
36 retrospective period of 30 days, and also found that profiles of daily individual adherence from  
37 MSI hair analysis could identify when patients were and were not taking study drug. The  
38 assessment of adherence from MSI hair strand analysis was 62% lower than adherence classified  
39 using paired plasma samples, the latter of which may be influenced by white-coat adherence. These  
40 findings demonstrate the ability of MSI hair analysis to examine daily variability of adherence  
41 behavior over a longer-term measurement and offer the potential for longitudinal comparison with  
42 risk behavior to target patient-specific adherence interventions and improve outcomes.

43

## 44 **Introduction**

45           Pre-exposure prophylaxis (PrEP) with antiretroviral drugs (ARVs) is effective against  
46 HIV-1 acquisition when sufficient drug concentrations are present during periods of exposure (1-  
47 3), conditions which rely on both PrEP adherence and persistence. Based on differences in tissue  
48 pharmacokinetics, the dosing frequency required to attain protective concentrations of ARVs can  
49 vary by route of HIV exposure (4). As a result, PrEP guidelines for oral agents recommend daily  
50 use for most populations and event-driven dosing only for cisgender men engaging in anal sex.  
51 Objective measures of adherence with implementation of PrEP through clinical trials,  
52 demonstration projects, and routine clinical dissemination have shown that individual levels of  
53 adherence and persistence can be complex and often significantly lower than dosing  
54 recommendations (5-8).

55           Evaluating PrEP effectiveness in the context of dynamic risk behavior (9) requires  
56 information about daily changes in ARV concentrations over time which is not possible using  
57 current objective adherence measures. The period of adherence captured by pharmacologic  
58 measures varies by biological matrix based on pharmacokinetics and analysis methods. These  
59 generally fall into measurements of recent behavior (eg from plasma, saliva, or urine) or  
60 cumulative behavior (eg from intracellular metabolites in blood cells, or hair thatches) (10).  
61 Measures of recent adherence, which are susceptible to white-coat (social desirability) bias, only  
62 reflect behavior over the past few days. Cumulative measures reflect average adherence over a  
63 period of weeks to months, but cannot differentiate changes in adherence within this period.  
64 While measures can be used in combination to couple short- and long-term adherence (11, 12),  
65 these strategies are still not capable of capturing daily adherence patterns over an extended  
66 period of time reflecting patients' actual daily use.

67 Hair is a unique biomatrix for adherence assessment because each strand represents a  
68 record of systemic drug concentrations incorporated into hair from blood during follicular  
69 growth and preserved as the hair grows. Sensitive analysis of hair strands by liquid  
70 chromatography-mass spectrometry (LC-MS) has been demonstrated for ARV drug  
71 concentrations, which scale proportionally with dose frequency(13) and can predict virologic  
72 success (14). LC-MS methods typically evaluate hair segments  $\geq 1$  cm that correspond to at least  
73 a month of growth. We have developed a new approach to measuring ARV drug exposure  
74 longitudinally along single hair strands at high spatial, and thus temporal, resolution using  
75 infrared matrix-assisted laser desorption electrospray ionization (IR-MALDESI) mass  
76 spectrometry imaging (MSI).

77 The HIV Prevention Trials Network (HPTN) 069/AIDS Clinical Trials Group (ACTG)  
78 A5305 study examined maraviroc (MVC) as an agent for PrEP, either alone or in combination  
79 with other antiretrovirals. Although MVC has not moved forward as a PrEP candidate, the study  
80 showed the safety and tolerability of MVC-based regimens (15, 16). In this work, we apply IR-  
81 MALDESI MSI to: 1) characterize MVC dosing behavior through benchmarking of longitudinal  
82 MVC profiles in hair following directly observed therapy (DOT) of daily and intermittent dosing  
83 in the ENLIGHTEN study; and, 2) investigate patterns of longer-term adherence in  
84 HPTN069/ACTGA5305 study samples, comparing these measures to commonly used adherence  
85 assessments. Using MVC as proof-of-concept, we demonstrate the capability of MSI hair  
86 analysis to examine daily ARV adherence patterns over one month via a single assay.

87

## 88 **Results**

### 89 **IR-MALDESI MSI benchmarking of MVC in hair strands: The ENLIGHTEN Study**

90 The ENLIGHTEN directly-observed-therapy (DOT) study provided MVC to HIV-  
91 negative volunteers in different dosing patterns. In our assessment of MVC disposition by IR-  
92 MALDESI MSI through the ENLIGHTEN study, we found that the quantitative patterns of  
93 MVC detectable along hair strands were well aligned with known dosing information, which  
94 ranged from daily (7x/week) to interrupted therapy (0, 1 or 3x/week). Regions of MVC  
95 accumulation associated with hair growth during an interrupted dosing period (3x/week,  
96 1x/week, or 0x/week) can be seen in Fig. 1A, along with higher MVC response on the right-  
97 hand, distal portion of the hair strands corresponding to growth during an earlier period of daily  
98 (7x/week) dosing. The 7-day washout interval between daily and differentiated dosing is also  
99 apparent, particularly between daily and 3x/week dosing shown at the top of Fig. 1A. A time  
100 series illustrating the movement of drug distally in hair strands collected throughout the  
101 transition between daily and intermediate dosing periods for one subject is shown in Fig. S1.

102 While within-individual longitudinal profiles showed MVC response scaling with dosing  
103 frequency, this observation did not hold across the whole cohort. Interquartile ranges of mean  
104 MVC signal abundance from daily and intermittent dosing regions could not be differentiated  
105 (Fig. 1B). Volunteers had a range of hair colors (table S1) and to account for between subject  
106 variability in MVC accumulation this caused, we normalized the raw MVC signal abundance by  
107 a melanin biomarker (pyrrole-2,3,5-tricarboxylic acid, PTCA) measured in the same hair strands.  
108 Mean MVC/PTCA values (Fig. 1C) had interquartile ranges for each dosing frequency that could  
109 be differentiated [MVC/PTCA, Daily: 0.745(0.440-0.845); 3x: 0.245 (0.140-0.330); 1x:  
110 0.075(0.020-0.135); 0x: 0.002 (0.000-0.005)].

111 Selection of a threshold value for PTCA-normalized MVC signal abundance for binary  
112 classification of adherence (adherent to regimen vs. not adherent to regimen) was determined

113 from a receiver operating characteristic curve. Fig. 1D shows the relationship between  
114 MVC/PTCA threshold values and the true positive rate (sensitivity) and true negative rate  
115 (specificity) of binary classification. We selected a threshold value of MVC/PTCA=0.35  
116 (specificity: 100%; sensitivity: 75%) to differentiate 3 or fewer doses per week from more  
117 frequent dosing behavior, prioritizing high specificity to minimize incorrectly labeling a patient  
118 as non-adherent to medication which could damage patient motivation (17).

119

### 120 **Assessing MVC PrEP adherence patterns in HPTN069/ACTGA5305**

121 Cumulative MVC concentrations in hair strands collected from across the three  
122 HPTN069/ACTGA5305 hair sampling timepoints of a pharmacologic substudy (18) (on drug:  
123 Week 24 and 48; follow-up: Week 49; table 1) were found to be strongly correlated between  
124 measurements by MSI and LC-quadrupole time-of-flight mass spectrometry (LC-QTOF/MS)  
125 (Fig. 2A; Spearman's rho,  $r = 0.78$ ,  $P < 0.0001$ ). MVC detectability (MSI and LC-QTOF/MS:  
126 26/32 measurable samples), medians (MSI: 0.394 ng/mg, LC-QTOF/MS: 0.361 ng/mg) and  
127 ranges (MSI: 0.120-2.03 ng/mg, LC-QTOF/MS: 0.035-1.53 ng/mg) were similar across methods  
128 over matched hair segment lengths. We found no difference in MVC concentration among  
129 regimen arms that included MVC (Fig. 2B;  $P > 0.14$ ) or between sexes (Fig. 2C;  $P = 0.94$ ).

130 Using the MVC/PTCA threshold, classification of adherence behavior among the  
131 participants (table S2) over the prior 30 days fell into three groups: drug response consistent with  
132 no days of adherence (n=12 blue points on left side of Fig. 3A; “no days”); drug response  
133 consistent with some days of adherence (n=9 blue points across center of Fig. 3A; “some days”);  
134 and, drug response consistent with all days of adherence (n=11 blue points on right side of Fig.  
135 3A; “all days”). As with benchmarking, we see in Fig. 3A that such classification groupings are

136 more ambiguous by MVC concentration alone: a cumulative hair concentration of 0.61 ng/mg,  
137 for example, was measured in samples classified separately as having 0/30 and 30/30 days of  
138 adherence, respectively. The cumulative MVC concentrations among samples classified as  
139 having some days of adherence are not significantly different from those with all days of  
140 adherence (Fig. 3B;  $P=0.61$ ). Conversely, normalization of MVC by PTCA results in  
141 MVC/PTCA distributions that are distinguishable across adherence groups (Fig. 3C; no  
142 days:some days,  $P=0.028$ ; no days:all days,  $P < 0.001$ ; and, some days: all days,  $P= 0.067$ ). The  
143 analysis of daily adherence behavior made possible through IR-MALDESI MSI also reveals  
144 variation in the individual patterns of normalized drug responses – including numbers of  
145 consecutive days of non-adherence – over the 30-day observation period among the group of  
146 samples with “some days” of adherence (Fig. 3D). Accompanying bar graphs for samples  
147 categorized as “no days” and “all days” of adherence are provided in Fig. S2 and S3,  
148 respectively.

149 Cumulative concentrations of MVC in hair over the prior month had poor correlation with  
150 plasma concentrations of MVC, which have an elimination half-life of 16 hours, in matched  
151 samples when participants were on study drugs (weeks 24 and 48) and at follow-up (week 49)  
152 (Fig. 4A;  $r = -0.07$ ,  $P=0.72$ ). Correlation between drug concentrations in hair assessed via LC-  
153 QTOF/MS to plasma MVC measures was similarly low ( $r = -0.03$ ,  $P=0.87$ ). Correlation between  
154 these measures improved when comparing IR-MALDESI MSI and plasma in weeks that  
155 participants were on drug (i.e., weeks 24 and 48) to account for the rapid MVC clearance from  
156 plasma after PrEP discontinuation, which occurred at week 49 ( $r=0.40$ ,  $P=0.05$ ). Further  
157 comparison of hair and plasma results at 24 and 48 weeks reveals disagreement in binary  
158 classification of adherence (Fig. 4B), with 84% of samples (21/25) classified as adherent by the

159 plasma MVC threshold of 4.6 ng/ml (18) and only 32% of samples (8/25) classified as adherent  
160 according to IR-MALDESI. Agreement between the two classification measures occurred in  
161 only 32% of samples, and 88% of discordance occurred in samples classified as adherent based  
162 on plasma and non-adherent based on hair analysis (McNemar test:  $\chi^2=9.94$ ,  $P=0.0016$ ).  
163 Comparison of whole-cohort MVC concentrations in hair at week 24 vs. week 48 (Fig. 4C, left)  
164 shows no statistically significant difference between time points ( $P=0.73$ ). In the seven  
165 participants for whom data were available at both 24 and 48 weeks, one patient had an apparent  
166 increase in MVC concentration between week 24 and 48, two had low concentrations at both  
167 time points, and four had a decrease in hair concentrations. As with Fig. 3C, we find that  
168 normalization to account for different melanin levels reveals different patterns from those in  
169 unadjusted analyses (cf. right panel vs. left panel of Fig. 4C): three participants appear to have  
170 similar levels of adherence at 24 and 48 weeks, two have consistent non-adherence, and two  
171 have decreasing adherence. For these seven participants, agreement between plasma and MSI  
172 hair adherence classification at 24 and 48 weeks varied from total discordance to total  
173 concordance (Fig. 4D).

174 Poor agreement was also found between frequency of pill openings within the prior month  
175 measured by Wisepill electronic monitoring and pharmacologic measures of adherence in 15  
176 samples with matched records (Fig. S4). Spearman's rho relating pill openings to hair MVC  
177 concentrations ( $r=0.12$ ,  $P=0.68$ ) and plasma ( $r=-0.07$ ,  $P=0.81$ ) suggest low correlation between  
178 paired values.

179

## 180 Discussion



181 IR-MALDESI MSI was able to evaluate MVC longitudinally in single hair strands at  
182 high spatial resolution and classify short-term changes in adherence behavior over the longer-  
183 term drug dosing record provided by hair. Accounting for differences in the accumulation of  
184 MVC in hair based on its melanin content was necessary to unambiguously classify adherence in  
185 the ENLIGHTEN study. Correlation between melanin and concentration of drug in hair has been  
186 well documented in forensic toxicology analysis of illicit drugs (19, 20), where the effect is  
187 stronger for basic compounds. Our prior work showed that a biomarker of melanin, PTCA, was  
188 more strongly correlated with MVC accumulation in hair than more acidic antiretrovirals such as  
189 emtricitabine and dolutegravir and suggested that the binding of MVC to melanin may limit its  
190 removal from hair strands after chemical hair treatments (21). Binary classification of adherence  
191 based on MVC/PTCA normalization was selected to maintain assay applicability across varied  
192 hair colors and types, and we prioritized assay specificity in establishing a MVC/PTCA threshold  
193 cutpoint differentiating 3 or fewer doses/week from more frequent dosing to avoid  
194 misclassification of non-adherence (17). As a result, adherence classification based on the  
195 selected cutpoint can be considered conservative for differentiating daily and intermittent dosing.  
196 Since target concentrations of MVC for PrEP have not been defined, this cutpoint only reflects  
197 adherence and not efficacy.

198 Longer-term adherence in HPTN069/ACTGA5305 hair strands provided a considerably  
199 different perspective than adherence assessed in plasma samples collected at the same  
200 timepoints. Daily adherence classification by IR-MALDESI MSI indicated that less than one-  
201 third of hair samples reflected consistent, sustained adherence throughout the prior 30 days.  
202 Matched plasma MVC concentrations, classified by an adherence threshold defined  
203 conservatively relative to benchmarked TFV and FTC plasma adherence thresholds (18),

204 indicated much higher recent adherence (84%). These samples may not represent an overlapping  
205 period of drug exposure because the proximal end of cut hair may correspond to growth  
206 occurring more than a week before collection (22), so comparisons have been interpreted solely  
207 as differences in short-term and longer-term adherence behavior. Higher adherence classification  
208 in plasma samples likely arises from changes in adherence behavior just prior to a clinic visit  
209 such as white-coat adherence (23) or participants simply being sensitized to the study and related  
210 procedures around study visits. The discordance between these measures underscores the need  
211 for monitoring both short and longer-term adherence in evaluations of PrEP efficacy.

212 Findings of longer-term adherence captured in hair were consistent with an additional  
213 pharmacologic assessment in the HPTN069/ACTGA5305 tissue sub-study. A comparison of the  
214 interquartile range of rectal concentrations of PrEP antiretrovirals (MVC, TFV, and FTC) (18)  
215 with pharmacokinetic studies of rectal drug concentrations ranging from single dose to steady-  
216 state dosing (24-26) (table S4) indicates that median tissue concentrations from individuals  
217 sampled across each dosing arm of HPTN069/ACTGA5305 fell below median values expected  
218 from daily dosing and may be more consistent with 4 or fewer doses per week. Levels of  
219 adherence suggested by these tissue concentrations are similar to our IR-MALDESI findings but  
220 not the high short-term adherence indicated by plasma.

221 Hair strand MSI analyses indicated heterogeneous periods of active dosing over 30 days  
222 with periodic PrEP engagement quantifiable in all but 5 samples. This approach offers a unique  
223 ability to evaluate both short-term and longer-term changes that are not captured by Wisepill  
224 data, which were not well-correlated with any other pharmacologic measures of adherence in  
225 HPTN069/ACTGA5305. It is important to note that none of the hair samples investigated here  
226 came from the 6 individuals who seroconverted during HPTN069/ACTGA5305 (15). While the

227 number of individuals for whom we were able to evaluate samples collected from both  
228 timepoints during active PrEP dosing in the HPTN069/ACTGA5305 study was limited, we  
229 found significant differences in adherence patterns that remained either high or low, or decreased  
230 over the course of the study. Although reasons behind non-adherence are varied, some patterns  
231 of use identified by hair MSI may have been a prevention-effective strategy (9), whereby study  
232 subjects took PrEP during periods of potential exposure to HIV, or perceived risk of HIV. A  
233 recent investigation of sexual behavior among MSM within the HPTN069/ACTGA5305 cohort  
234 indicated that participants reporting condom-less sex had higher rates of plasma drug  
235 concentrations classified as adherent (27). Assessing adherence in the context of risk behavior  
236 may provide an important mechanism to support and sustain adherence and persistence of PrEP  
237 use.

238 Our study has several limitations. The sample size of our benchmarking study was small,  
239 which allowed us to identify a threshold differentiating daily dosing from 3 or fewer doses per  
240 week but further studies will be needed to discriminate dosing frequency more granularly.  
241 Collection of hair strands by cutting precluded interrogation of an individual's most recent drug-  
242 taking behavior, and we recommend plucking 5 strands when assessment of the most recent  
243 week of dosing is essential. Finally, the availability of HPTN069/ACTGA5305 hair samples  
244 limited the number of individuals who participated in the pharmacokinetic sub-study that we  
245 could investigate.

246 We have shown the unique capabilities of IR-MALDESI MSI for evaluating daily  
247 antiretroviral adherence throughout the record of drug accumulation preserved in hair strands. The  
248 approach is sensitive to MVC as well as a range of ARVs and other small molecules (28) making  
249 it highly adaptable for monitoring multidrug regimens, including those containing FTC as we have

250 demonstrated previously (29). IR-MALDESI MSI offers a new approach for measuring adherence  
251 patterns that provides a temporal overview of dosing that can be used in research and could be an  
252 important addition to adherence monitoring and intervention.

253

## 254 **Methods**

### 255 **Study Design**

256 Benchmarking of MVC in hair strands was performed as part of the ENLIGHTEN Study  
257 (NCT03218592). Consenting HIV-uninfected healthy volunteers (n=12, table S1) were  
258 administered MVC 300mg by directly observed therapy. All study volunteers participated in a  
259 28-day period of daily dosing after which they were randomized (n=4) for a subsequent 28-day  
260 period to one of three differentiated dosing frequencies: 0 doses/week, 1 dose/week, or 3  
261 doses/week. An interval of 7 days separated each dosing period. Hair was collected by cutting  
262 approximately 10 hair strands from the occipital region close to the scalp using scissors, adhered  
263 to aluminum foil at their distal end to preserve orientation, and stored with a desiccant gel pack  
264 at 4°C until analysis. MSI response to MVC accumulation in ENLIGHTEN hair strands in daily  
265 and intermittent dosing periods was evaluated using samples collected at the end of each phase.

266 Characterization of PrEP adherence by IR-MALDESI MSI was performed through  
267 HPTN069/ACTGA5305 (NCT01505114). This was a 48-week placebo-controlled study in at-  
268 risk MSM and women of the safety and tolerability of candidate HIV PrEP regimens including  
269 MVC alone or in combination with either tenofovir disoproxil fumarate (TDF) or emtricitabine  
270 (FTC) in comparison to TDF+FTC, conducted from 2012-2015 (15, 16). Adherence  
271 measurements were undertaken for all participants (electronic drug monitoring using a pillbox  
272 (Wisepill) containing the 3 ARVs, drug level monitoring from blood stored at every visit), with

273 additional sampling of tissues, plasma, and hair conducted through a nested pharmacologic  
274 substudy (18). Approximately 200 strands of hair were collected from sub-study participants at  
275 three time points (on drug: Week 24, Week 48; follow-up: Week 49). Hair storage followed the  
276 same protocol as ENLIGHTEN. IR-MALDESI MSI analysis was performed on MVC-based  
277 regimen samples (MVC, MVC+TDF, MVC+FTC) for which hair was not consumed during LC-  
278 MS analysis. As summarized in Table 1, this corresponded to a total of 32 samples collected  
279 across the study from 19 participants (10 male, 9 female) whose demographic information is  
280 included in table S2.

281

## 282 **Hair Analysis**

### 283 *IR-MALDESI MSI*

284 Hair strands (n=4) were oriented horizontally and adhered to glass microscope slides with  
285 proximal strand ends positioned to the left for analysis by IR-MALDESI MSI (28, 30).  
286 Longitudinal analysis of MVC was performed using a two-step laser desorption and electrospray  
287 ionization process has been detailed elsewhere (21, 30) and will be described briefly. Prepared  
288 sample slides were positioned on a temperature-controlled stage in the IR-MALDESI MSI  
289 source enclosure before being cooled to -9°C under dry nitrogen gas flow to reduce humidity.  
290 Following temperature stabilization, the nitrogen flow was interrupted and the MSI source was  
291 opened to the ambient atmosphere to grow a thin layer of ice on the sample surface. Following  
292 ice growth, the source was closed and nitrogen was used to maintain a relative humidity of ~14%  
293 throughout the experiment to preserve ice thickness. The ice layer promoted sample desorption  
294 from single IR laser pulses ( $\lambda=2940$  nm, IR Opolette, Opotek, Carlsbad, CA). Volatilized  
295 material expanding upward from the sample intersected an orthogonal electrospray plume to

296 create analyte ions, which were sampled into an orbitrap mass spectrometer (ThermoFisher Q  
297 Exactive Plus, Bremen, Germany) for analysis. A list of targeted analytes is shown in table S4.  
298 For analysis of positive ions, the mass spectrometer was operated in positive polarity full scan  
299 mode ( $m/z$  200 to 800; resolving power: 140,000 at  $m/z$  200; s-lens RF level: 50, mass accuracy:  
300  $<1$  ppm). For analysis of negative ions, the mass spectrometer was operated in full scan mode  
301 with negative polarity ( $m/z$  190 – 760; resolving power: 140,000 at  $m/z$  200; s-lens RF level: 50,  
302 mass accuracy:  $<1$  ppm). Analysis was performed with a step-size of 100  $\mu\text{m}$  between sampling  
303 locations, corresponding to approximately 7-8 hours of growth based on the average growth rate  
304 ( $\sim 1\text{cm/month}$ ) in the occipital region (22). A summary of acquisition parameters and a list of  
305 targeted analytes is shown in table S3. Separate regions of interest were interrogated by IR-  
306 MALDESI MSI for analysis of MVC and the melanin biomarker PTCA (fig. S5). MVC was  
307 evaluated proximally, corresponding to the most recent growth of hair prior to sampling, and  
308 PTCA was evaluated distally by submerging this end of the slide in a solution of 1 M ammonium  
309 hydroxide in 45/45/10 methanol/water/hydrogen peroxide (v/v/v) for 10 min (21).

310 Calibration of IR-MALDESI response to MVC in hair strands was performed using  
311 standards prepared from blank (drug-free) hair matrix by incubation in drug, covering the range  
312 0.145-2.99 ng/mg hair. Standards were prepared by transferring drug-free hair (approximately 10  
313 mg) into a vial containing 20 mL of analyte and solvent (50:50 Methanol:Water), incubating for  
314 approximately 24 hours in a reciprocal shaking bath before hair was rinsed with fresh solvent  
315 and stored at  $-20^{\circ}\text{C}$ . One level of standards (0.299 ng/mg) was reserved for use as a positive  
316 control in all assessments of clinical samples. A representative image showing the MVC  
317 response from a calibration and a composite calibration curve from  $n=5$  calibrations conducted  
318 during experimental work is shown in fig. S6.

319 Data were processed using MSiReader and custom MATLAB software (Mathworks, Inc.,  
320 Natick, MA) (30). The MVC response from three neighboring sampling locations along a  
321 composite longitudinal profile of sampled hair strands was binned to evaluate daily accumulation  
322 of drug in hair throughout the entire period of assessment (benchmarking: 1.5 cm, 1.5 months;  
323 HPTN069/ACTGA5305: 1 cm, 1 month). Normalized MVC/PTCA profiles were compared to  
324 the adherence threshold for daily adherence classification. Cumulative concentrations of MVC  
325 were determined by averaging MSI signal abundance over a segment length matched to LC-MS  
326 analysis.

327

#### 328 *LC-QTOF/MS*

329 LC-MS analysis of MVC in HPTN069/ACTGA5305 hair samples was conducted in the  
330 UCSF TB Hair Analysis Laboratory using an Agilent Liquid Chromatograph 1260 (Agilent  
331 Technologies, Sta Clara, CA) attached to an Agilent Quadrupole Time-of-Flight Mass  
332 Spectrometer 6550 (31). Hair strands (proximal 1 cm segments, 2 mg) were pulverized using an  
333 Omni Bead Ruptor homogenizer (OMNI International, NW Kennesaw, GA, USA). Pulverized  
334 hair was extracted with 0.5 mL methanol followed by a two-hour mixing in a water bath shaker  
335 maintained at 37°C; the resulting extract was evaporated before reconstitution to 0.2 mL 10%  
336 acetonitrile in water with 0.1% formic acid. The sample extract (5 µL) was injected into the  
337 Agilent Liquid Chromatograph 1260 (Agilent Technologies, Sta Clara, CA) attached to an  
338 Agilent Quadrupole Time-of-Flight Mass Spectrometer 6550. Analytes in the sample extract  
339 were separated by gradient elution on an Agilent Poroshell 120, EC-C18 column (2.1 x 100 mm,  
340 2.7 µm particle size) using water with 0.05% formic acid and 5mM ammonium formate as  
341 mobile phase A (MPA) and acetonitrile with 0.05% formic acid as mobile phase B (MPB). The

342 gradient used for analyte separation consisted of 5% MPB at 0–0.5 min, gradient to 30% MPB  
343 from 0.5 to 1.5 min, gradient to 70% MPB from 1.5 to 4.5 min, gradient to 100% MPB at 4.5-7.5  
344 min, and 100% MPB at 7.5–10 min; a post-wash at 5% MPB followed each run for 4 min.  
345 Ionization of MVC in the mass spectrometer was achieved using electrospray ionization (ESI) in  
346 positive polarity, and data acquisition was performed in the auto- MS/MS mode. Detection of the  
347 analyte was done by accurate mass match within 10 parts per million, retention time match  
348 within 0.1 min, target score (indicator of isotopic pattern match) of at least 70 and an MS/MS  
349 spectral match score of at least 70.

350 Quantification of MVC was done by isotope dilution method using MVC-d6 as internal  
351 standard. MVC drug levels were normalized by weight. The limit of detection was 0.05 ng/mg  
352 while the lower limit of quantification was 0.2 ng/mg. Procedural quality control materials and  
353 procedural blank were run along with the calibration curve at the start, middle, and end of each  
354 run. Two quality control materials were used at low and high concentrations. To accept the  
355 results of a batch run, QC materials measurements must be within 15% of their target values.

## 356 **Statistical Analyses**

357 The Wilcoxon rank-sum test was used to compare two experiment groups. Spearman's  
358 rank order correlation was used to assess the relationship between two analytical measures of  
359 matched samples. A Kruskal-Wallis one-way analysis of variance (ANOVA) test followed by  
360 Dunn-Sidak p-value corrections for multiple comparisons was performed between three  
361 experiment groups. Statistical significance by these methods was obtained by using Matlab.  
362 McNemar's test of paired nominal data was used to compare binary adherence classifiers,  
363 obtained from R.



364 All IR-MALDESI MSI data are available online through the METASPACE database.

365

### 366 **Acknowledgements**

367 This work was supported in part by the National Institutes of Allergy and Infectious Diseases

368 and National Institutes of Mental Health (P30 AI50410, R01 AI122319), AIDS Clinical Trial

369 Group UM1 AI 068636, and HIV Prevention Trial Network UM1-AI068619. We gratefully

370 acknowledge the participants and members of the HPTN 069/ACTG A5305 study team. We

371 would especially like to thank Krista Yuhas for providing demographic and electronic

372 monitoring data.

373

374 **Supporting Information**

375 Figure S1. Time-series of MVC accumulation in hair strands following the transition from daily  
376 to differentiated dosing.

377 Figure S2. Bar graphs of daily adherence classification measured by MSI within samples where  
378 “no days” of adherence was determined.

379 Figure S3. Bar graphs of daily adherence classification measured by MSI within samples where  
380 “all days” of adherence was determined.

381 Figure S4. Correlation between Wisepill frequency of pill openings and MVC concentrations in  
382 hair or plasma.

383 Figure S5. MSI sample analysis approach.

384 Figure S6. MSI MVC calibration with incubated hair standards.

385

386 Table S1. Clinical information on healthy individuals administered maraviroc in the  
387 ENLIGHTEN study.

388 Table S2. Clinical information on participants of HPTN069 providing hair samples.

389 Table S3. IR-MALDESI MSI analytes targeted in hair strand analysis and acquisition parameters

390 Table S4. Colorectal tissue concentrations of ARVs in HPTN069 compared to PK studies.

391

392

393

394

395

396 **References**

- 397 1. Baeten JM, Donnell D, Ndase P, Mugo NR, Campbell JD, Wangisi J, Tappero JW, Bukusi  
398 EA, Cohen CR, Katabira E, Ronald A, Tumwesigye E, Were E, Fife KH, Kiarie J, Farquhar  
399 C, John-Stewart G, Kakia A, Odoyo J, Mucunguzi A, Nakku-Joloba E, Twesigye R, Ngure  
400 K, Apaka C, Tamoooh H, Gabona F, Mujugira A, Panteleeff D, Thomas KK, Kidoguchi L,  
401 Krows M, Revall J, Morrison S, Haugen H, Emmanuel-Ogier M, Ondrejcek L, Coombs  
402 RW, Frenkel L, Hendrix C, Bumpus NN, Bangsberg D, Haberer JE, Stevens WS, Lingappa  
403 JR, Celum C. 2012. Antiretroviral Prophylaxis for HIV Prevention in Heterosexual Men  
404 and Women. *New England Journal of Medicine* 367:399-410.
- 405 2. Grant RM, Lama JR, Anderson PL, McMahan V, Liu AY, Vargas L, Goicochea P, Casapía  
406 M, Guanira-Carranza JV, Ramirez-Cardich ME, Montoya-Herrera O, Fernández T, Veloso  
407 VG, Buchbinder SP, Chariyalertsak S, Schechter M, Bekker L-G, Mayer KH, Kallás EG,  
408 Amico KR, Mulligan K, Bushman LR, Hance RJ, Ganoza C, Defechereux P, Postle B,  
409 Wang F, McConnell JJ, Zheng J-H, Lee J, Rooney JF, Jaffe HS, Martinez AI, Burns DN,  
410 Glidden DV. 2010. Preexposure Chemoprophylaxis for HIV Prevention in Men Who Have  
411 Sex with Men. *New England Journal of Medicine* 363:2587-2599.
- 412 3. Choopanya K, Martin M, Suntharasamai P. 2013. *Lancet* 381:2083.
- 413 4. Cottrell ML, Yang KH, Prince HMA, Sykes C, White N, Malone S, Dellon ES, Madanick  
414 RD, Shaheen NJ, Hudgens MG, Wulff J, Patterson KB, Nelson JAE, Kashuba ADM. 2016.  
415 A Translational Pharmacology Approach to Predicting Outcomes of Preexposure  
416 Prophylaxis Against HIV in Men and Women Using Tenofovir Disoproxil Fumarate With  
417 or Without Emtricitabine. *Journal of Infectious Diseases* 214:55-64.

- 418 5. Marrazzo JM, Ramjee G, Richardson BA, Gomez K, Mgodhi N, Nair G, Palanee T,  
419 Nakabiito C, van der Straten A, Noguchi L, Hendrix CW, Dai JY, Ganesh S, Mkhize B,  
420 Taljaard M, Parikh UM, Piper J, Mâsse B, Grossman C, Rooney J, Schwartz JL, Watts H,  
421 Marzinke MA, Hillier SL, McGowan IM, Chirenje ZM. 2015. Tenofovir-Based  
422 Preexposure Prophylaxis for HIV Infection among African Women. *New England Journal*  
423 *of Medicine* 372:509-518.
- 424 6. Van Damme L, Corneli A, Ahmed K, Agot K, Lombaard J, Kapiga S, Malahleha M, Owino  
425 F, Manongi R, Onyango J, Temu L, Monedi MC, Mak'Oketch P, Makanda M, Reblin I,  
426 Makatu SE, Saylor L, Kiernan H, Kirkendale S, Wong C, Grant R, Kashuba A, Nanda K,  
427 Mandala J, Fransen K, Deese J, Crucitti T, Mastro TD, Taylor D. 2012. Preexposure  
428 Prophylaxis for HIV Infection among African Women. *New England Journal of Medicine*  
429 367:411-422.
- 430 7. van der Straten A, Van Damme L, Haberer JE, Bangsberg DR. 2012. Unraveling the  
431 divergent results of pre-exposure prophylaxis trials for HIV prevention. *Aids* 26:F13-F19.
- 432 8. Zhang J, Li C, Xu J, Hu Z, Rutstein SE, Tucker JD, Ong JJ, Jiang Y, Geng W, Wright ST,  
433 Cohen MS, Shang H, Tang W. 2022. Discontinuation, suboptimal adherence, and  
434 reinitiation of oral HIV pre-exposure prophylaxis: a global systematic review and meta-  
435 analysis. *The Lancet HIV* 9:e254-e268.
- 436 9. Haberer JE, Bangsberg DR, Baeten JM, Curran K, Koechlin F, Amico KR, Anderson P,  
437 Mugo N, Venter F, Goicochea P, Caceres C, O'Reilly K. 2015. Defining success with HIV  
438 pre-exposure prophylaxis: A prevention-effective adherence paradigm. *AIDS* 29:1277-  
439 1285.

- 440 10. Spinelli MA, Haberer J, Chai PR, Castillo-Mancilla J, Anderson PL. Approaches to  
441 Objectively Measure Antiretroviral Medication Adherence and Drive Adherence  
442 Interventions. *Current HIV/AIDS reports* 17:301-314.
- 443 11. Castillo-Mancilla JR, Zheng JH, Rower JE, Meditz A, Gardner EM, Predhomme J,  
444 Fernandez C, Langness J, Kiser JJ, Bushman LR, Anderson PL. 2013. Tenofovir,  
445 emtricitabine, and tenofovir diphosphate in dried blood spots for determining recent and  
446 cumulative drug exposure. *AIDS Research and Human Retroviruses* 29:384-390.
- 447 12. Velloza J, Bacchetti P, Hendrix CW, Murnane P, Hughes JP, Li M, Curlin ME, Holtz TH,  
448 Mannheimer S, Marzinke MA, Amico KR, Liu A, Piwowar-Manning E, Eshleman SH,  
449 Dye BJ, Gandhi M, Grant RM, Team HAS. 2019. Short- and Long-Term Pharmacologic  
450 Measures of HIV Pre-exposure Prophylaxis Use Among High-Risk Men Who Have Sex  
451 With Men in HPTN 067/ADAPT. *Jaids-Journal of Acquired Immune Deficiency  
452 Syndromes* 82:149-158.
- 453 13. Liu AY, Yang QY, Huang Y, Bacchetti P, Anderson PL, Jin CS, Goggin K, Stojanovski  
454 K, Grant R, Buchbinder SP, Greenblatt RM, Gandhi M. 2014. Strong Relationship between  
455 Oral Dose and Tenofovir Hair Levels in a Randomized Trial: Hair as a Potential Adherence  
456 Measure for Pre-Exposure Prophylaxis (PrEP). *Plos One* 9.
- 457 14. Gandhi M, Ameli N, Bacchetti P, Anastos K, Gange SJ, Minkoff H, Young M, Milam J,  
458 Cohen MH, Sharp GB, Huang Y, Greenblatt RM. 2011. Atazanavir Concentration in Hair  
459 Is the Strongest Predictor of Outcomes on Antiretroviral Therapy. *Clinical Infectious  
460 Diseases* 52:1267-1275.
- 461 15. Gulick RM, Wilkin TJ, Chen YQ, Landovitz RJ, Amico KR, Young AM, Richardson P,  
462 Marzinke MA, Hendrix CW, Eshleman SH, McGowan I, Cottle LM, Andrade A, Marcus

- 463 C, Klingman KL, Chege W, Rinehart AR, Rooney JF, Andrew P, Salata RA, Magnus M,  
464 Farley JE, Liu A, Frank I, Ho K, Santana J, Stekler JD, McCauley M, Mayer KH. 2017.  
465 Phase 2 Study of the Safety and Tolerability of Maraviroc-Containing Regimens to Prevent  
466 HIV Infection in Men Who Have Sex With Men (HPTN 069/ACTG A5305). *The Journal*  
467 *of Infectious Diseases* 215:238-246.
- 468 16. Gulick RM, Wilkin TJ, Chen YQ, Landovitz RJ, Amico KR, Young AM, Richardson P,  
469 Marzinke MA, Hendrix CW, Eshleman SH, McGowan I, Cottle LM, Andrade A, Marcus  
470 C, Klingman KL, Chege W, Rinehart AR, Rooney JF, Andrew P, Salata RA, Siegel M,  
471 Manabe YC, Frank I, Ho K, Santana J, Stekler JD, Swaminathan S, McCauley M, Hodder  
472 S, Mayer KH. 2017. Safety and Tolerability of Maraviroc-Containing Regimens to Prevent  
473 HIV Infection in Women A Phase 2 Randomized Trial. *Annals of Internal Medicine*  
474 167:384-+.
- 475 17. Hill LM, Golin CE, Pack A, Carda-Auten J, Wallace DD, Cherkur S, Farel CE, Rosen EP,  
476 Gandhi M, Prince HMA, Kashuba ADM. 2020. Using Real-Time Adherence Feedback to  
477 Enhance Communication About Adherence to Antiretroviral Therapy: Patient and  
478 Clinician Perspectives. *Janac-Journal of the Association of Nurses in Aids Care* 31:25-34.
- 479 18. Sekabira R, Yuhas K, McGowan I, Brand RM, Marzinke M, Mayer K, Landovitz RJ,  
480 Wilkin T, Amico KR, Manabe Y, Frank I, Kekitiinwa AR, Gulick RM, Hendrix CW. 2020.  
481 Higher Colon Tissue Infectivity in HIV Seronegative Cisgender Women compared to  
482 Cisgender Men on Candidate Oral Antiretroviral (ARV) Pre-Exposure Prophylaxis (PrEP)  
483 Regimens in HPTN 069. *Journal of the International Aids Society* 23:133-134.

- 484 19. Rollins DE, Wilkins DG, Krueger GG, Augsburger MP, Mizuno A, O'Neal C, Borges CR,  
485 Slawson MH. 2003. The effect of hair color on the incorporation of codeine into human  
486 hair. *Journal of Analytical Toxicology* 27:545-551.
- 487 20. Slawson MH, Wilkins DC, Rollins DE. 1998. The incorporation of drugs into hair:  
488 Relationship of hair color and melanin concentration to phencyclidine incorporation.  
489 *Journal of Analytical Toxicology* 22:406-413.
- 490 21. Gilliland WM, White NR, Yam BH, Mwangi JN, Prince HMA, Weideman AM, Kashuba  
491 ADM, Rosen EP. 2020. Influence of hair treatments on detection of antiretrovirals by mass  
492 spectrometry imaging. *Analyst* 145:4540-4550.
- 493 22. LeBeau MA, Montgomery MA, Brewer JD. 2011. The role of variations in growth rate and  
494 sample collection on interpreting results of segmental analyses of hair. *Forensic Science*  
495 *International* 210:110-116.
- 496 23. Podsadecki TJ, Vrijens BC, Tousset EP, Rode RA, Hanna GJ. 2008. "White coat  
497 compliance" limits the reliability of therapeutic drug monitoring in HIV-1-infected  
498 patients. *HIV Clinical Trials* 9:238-246.
- 499 24. Asmuth DM, Thompson CG, Chun TW, Ma ZM, Mann S, Sainz T, Serrano-Villar S, Utay  
500 NS, Garcia JC, Troia-Cancio P, Pollard RB, Miller CJ, Landay A, Kashuba AD. 2017.  
501 Tissue Pharmacologic and Virologic Determinants of Duodenal and Rectal  
502 Gastrointestinal-Associated Lymphoid Tissue Immune Reconstitution in HIV-Infected  
503 Patients Initiating Antiretroviral Therapy. *Journal of Infectious Diseases* 216:813-818.
- 504 25. Brown KC, Patterson KB, Malone SA, Shaheen NJ, Asher Prince HM, Dumond JB, Spacek  
505 MB, Heidt PE, Cohen MS, Kashuba ADM. 2011. Single and Multiple Dose

- 506            Pharmacokinetics of Maraviroc in Saliva, Semen, and Rectal Tissue of Healthy HIV-  
507            Negative Men. *The Journal of Infectious Diseases* 203:1484-1490.
- 508    26.    Hendrix CW, Andrade A, Bumpus NN, Kashuba AD, Marzinke MA, Moore A, Anderson  
509            PL, Bushman LR, Fuchs EJ, Wiggins I, Radebaugh C, Prince HA, Bakshi RP, Wang R,  
510            Richardson P, Shieh E, McKinstry L, Li X, Donnell D, Elharrar V, Mayer KH, Patterson  
511            KB. 2016. Dose Frequency Ranging Pharmacokinetic Study of Tenofovir-Emtricitabine  
512            After Directly Observed Dosing in Healthy Volunteers to Establish Adherence  
513            Benchmarks (HPTN 066). *Aids Research and Human Retroviruses* 32:32-43.
- 514    27.    Mayer KH, Yuhas K, Amico KR, Wilkin T, Landovitz RJ, Richardson P, Marzinke MA,  
515            Hendrix CW, Eshleman SH, Cottle LM, Marcus C, Chege W, Rinehart AR, Rooney JF,  
516            Andrew P, Salata RA, Magnus M, Farley JE, Liu AY, Frank I, Ho K, Santana J, Stekler  
517            JD, Chen YQ, McCauley M, Gulick RM, Team HAS. 2022. Sexual behavior and  
518            medication adherence in men who have sex with men participating in a pre-exposure  
519            prophylaxis study of combinations of Maraviroc, Tenofovir Disoproxil Fumarate and/or  
520            Emtricitabine (HPTN 069/ACTG 5305). *AIDS and Behavior* doi:10.1007/s10461-022-  
521            03736-z.
- 522    28.    Rosen EP, Thompson CG, Bokhart MT, Prince HMA, Sykes C, Muddiman DC, Kashuba  
523            ADM. 2016. Analysis of Antiretrovirals in Single Hair Strands for Evaluation of Drug  
524            Adherence with Infrared-Matrix-Assisted Laser Desorption Electrospray Ionization Mass  
525            Spectrometry Imaging. *Analytical Chemistry* 88:1336-1344.
- 526    29.    Mwangi JN, Gilliland WM, Jr., White N, Sykes C, Poliseno A, Knudtson KA, Hightow-  
527            Weidman L, Kashuba ADM, Rosen EP. 2022. Mass Spectroscopy Imaging of Hair Strands



528 Captures Short-Term and Long-Term Changes in Emtricitabine Adherence. *Antimicrob*  
529 *Agents Chemother* 66:e0217621.

530 30. Gilliland WM, Prince HMA, Polisen A, Kashuba ADM, Rosen EP. 2019. Infrared Matrix-  
531 Assisted Laser Desorption Electrospray Ionization Mass Spectrometry Imaging of Human  
532 Hair to Characterize Longitudinal Profiles of the Antiretroviral Maraviroc for Adherence  
533 Monitoring. *Analytical Chemistry* 91:10816-10822.

534 31. Gerona R, Wen A, Aguilar D, Shum J, Reckers A, Bacchetti P, Gandhi M, Metcalfe J.  
535 2019. Simultaneous analysis of 11 medications for drug resistant TB in small hair samples  
536 to quantify adherence and exposure using a validated LC-MS/MS panel. *Journal of*  
537 *Chromatography B* 1125:121729.

538

539

540 **FIGURES**

541

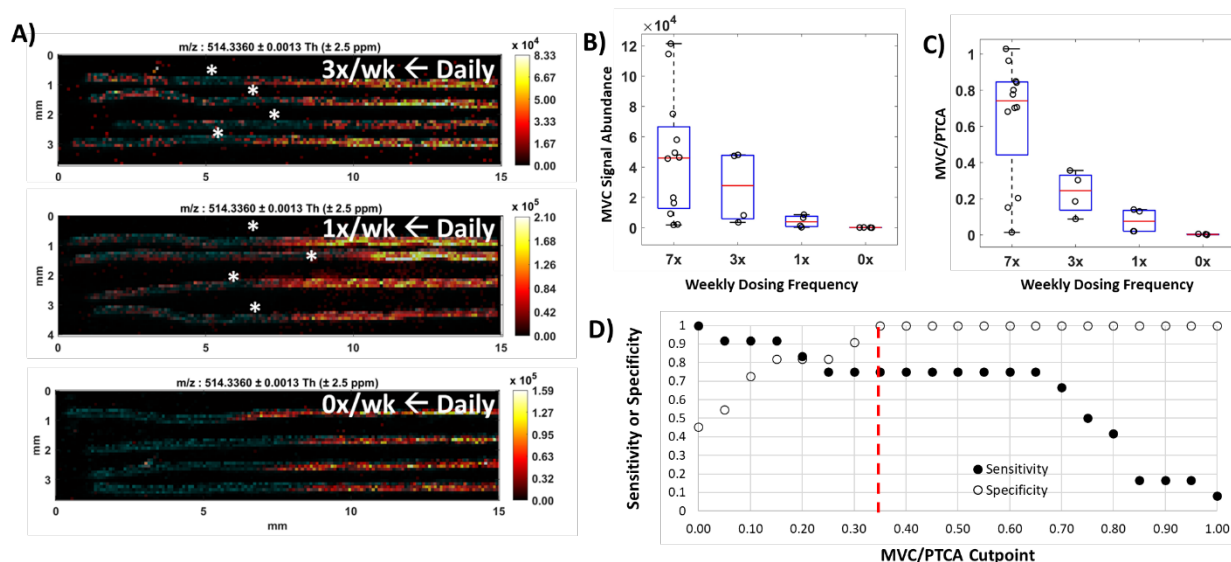

542

543

544 **Fig. 1. Benchmarking MVC in hair strands with MSI.** (A) Representative IR-MALDESI MSI  
545 MVC ion maps showing drug accumulation associated with daily dosing and each intermittent  
546 dosing group (from top: 3x/week, 1x/week, and 0x/week, respectively) in hair strands oriented  
547 with time of growth increasing distally from left to right. MVC was measured over the proximal  
548 15 mm, an estimated 1.5 months of growth, of samples collected at the end of the intermittent  
549 dosing period to evaluate dose-response of MVC accumulation in hair. MVC signal abundance  
550 (m/z 514.3360) is represented by a color scale increasing in concentration from regions of dark  
551 red/black to regions of orange/yellow. Cholesterol present in the hair strands (m/z 369.3516,  
552 shown in blue) is overlaid to clearly show the shape, orientation, and length of the individual  
553 strands. Apparent regions of each strand associated with a 7-day washout between dosing periods  
554 are denoted by a white asterisk. Hair was collected by clipping close to the scalp. (B) Mean IR-  
555 MALDESI MVC signal abundance associated with each ENLIGHTEN dosing group evaluated  
556 from composite longitudinal hair profiles. (C) PTCA-normalized MVC signal abundance  
557 associated with each dosing group. (D) ROC sensitivity and specificity of daily MVC adherence  
558 binary classification based on adherence cutpoint. The selected cutpoint value MVC/PTCA=0.35  
559 is demarcated by a red dashed line.

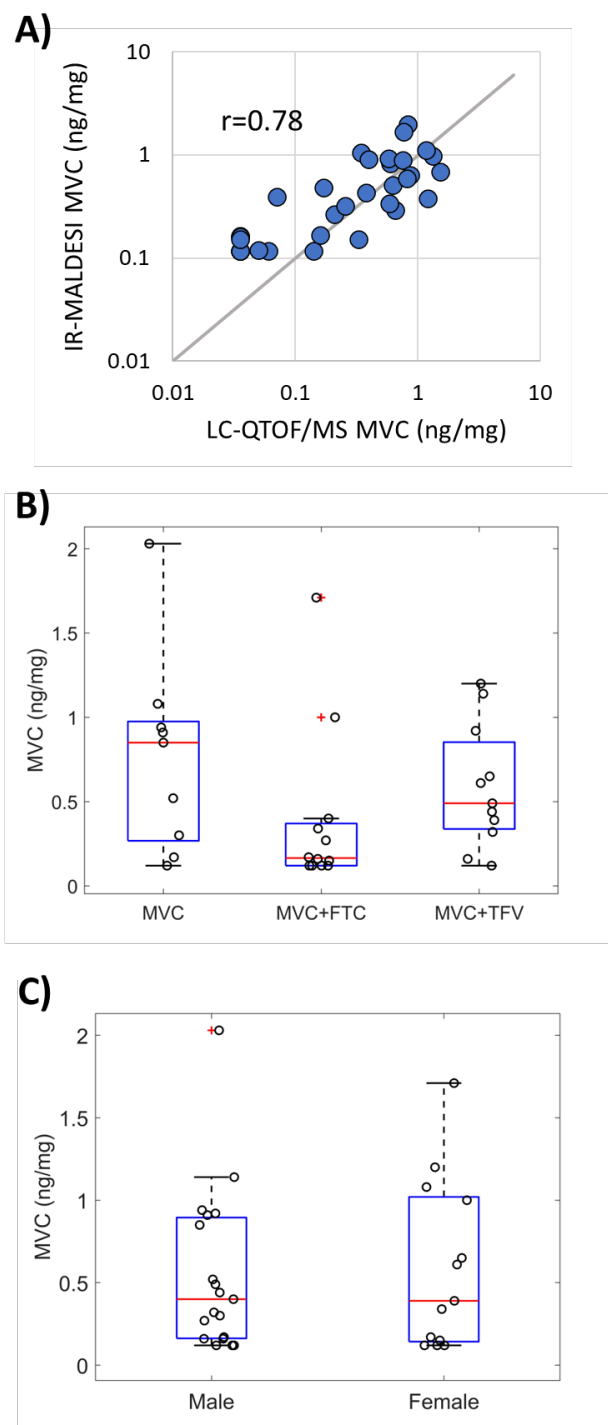

560

561 **Fig. 2. Cumulative MVC accumulation in hair strands during HPTN069/ACTGA5305.** (A)  
562 Cumulative MVC concentration evaluated in the proximal 1 cm of hair strands by LC-QTOF/MS  
563 and MSI. Gray 1:1 line provided for comparison. (B) HPTN069/ACTGA5305 hair substudy  
564 MVC concentrations in each dosing arm. (C) HPTN069/ACTGA5305 hair substudy MVC  
565 concentrations by sex.

566

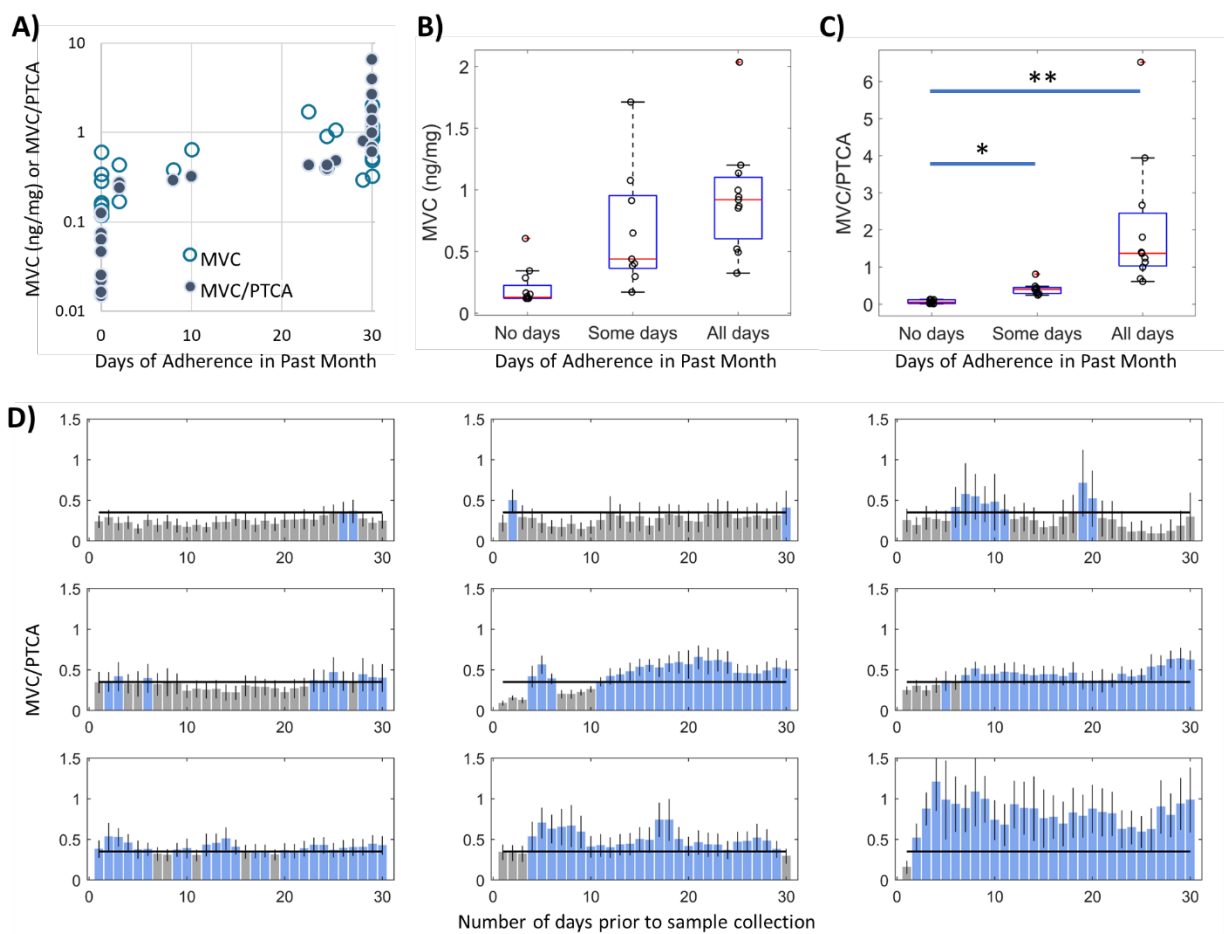

567

568 **Fig. 3. Adherence classification of HPTN069/ACTGA5305 hair strands.** (A) MVC  
569 concentration or MVC/PTCA normalized response in hair strands relative to the number of days  
570 classified as reflecting adherence within the past 30 days prior to hair sample collection. (B)  
571 MVC concentration of hair strands within groups of adherence behavior associated with no,  
572 some, or all days classified as adherent. (C) MVC/PTCA response in hair strands within groups  
573 of adherence behavior associated with no, some, or all days classified as adherent. (D) Bar  
574 graphs of adherence measured by MSI within samples where “some days” of adherence was  
575 determined. Blue bars reflect days in which MVC response exceeded the adherence cutpoint and  
576 gray bars reflect days where MVC response did not exceed the adherence cutpoint.  
577

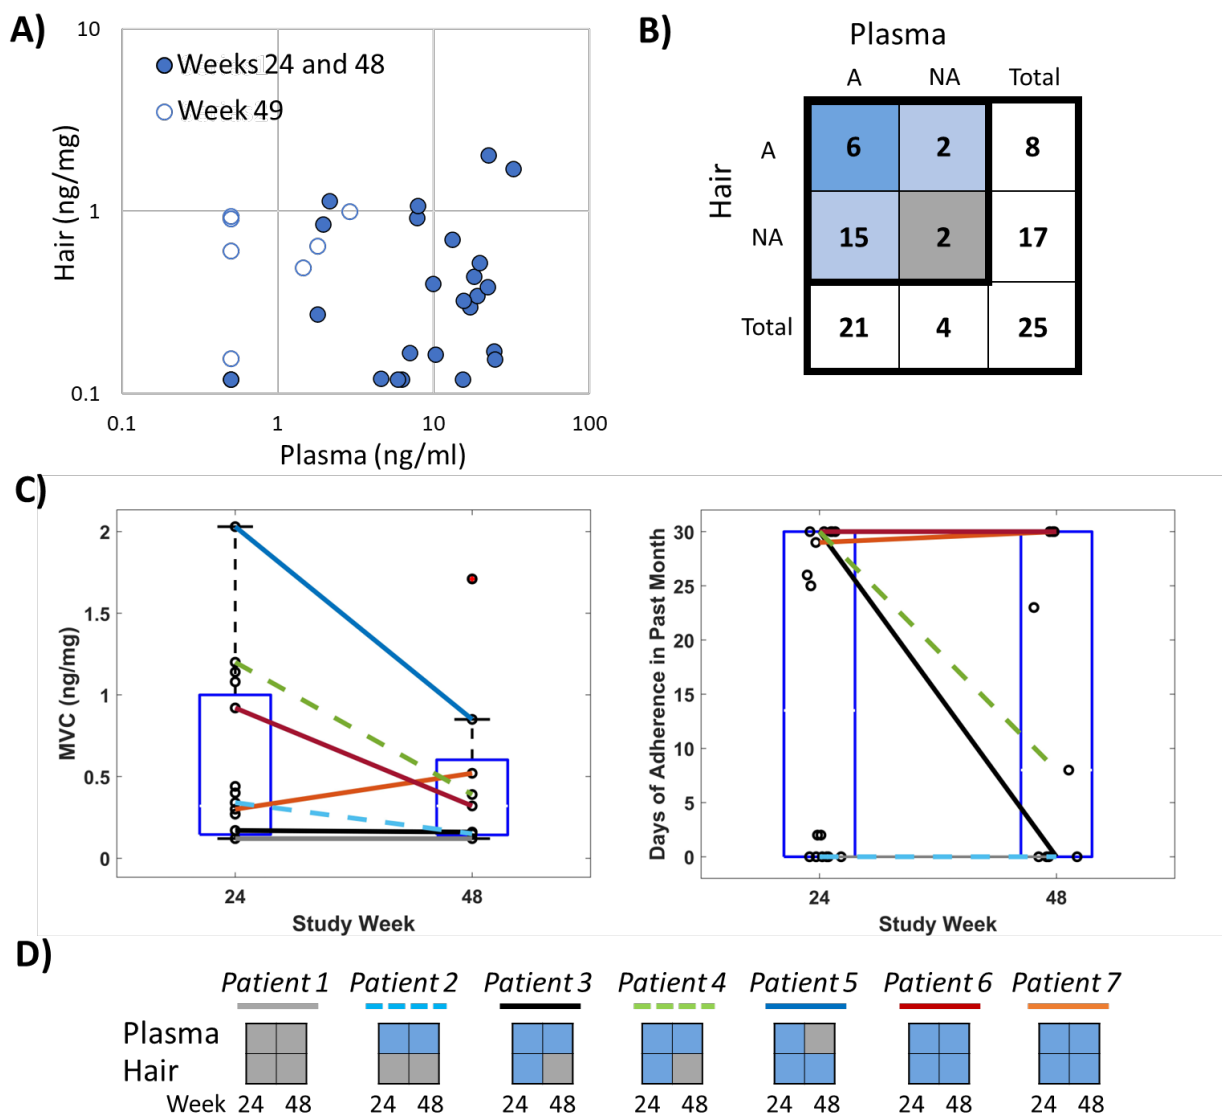

578

579 **Fig. 4. Comparison of long-term and short-term objective adherence measures from**  
 580 **HPTN069/ACTGA5305.** (A) Comparison of plasma concentration and hair MSI concentration.  
 581 Samples collected at week 24 and 48 are denoted by a solid circle and samples collected at week  
 582 49 have an open circle. (B) Contingency table of adherence classification by hair and plasma  
 583 where *A* denotes the number of samples classified as adherent and *NA* denotes the number of  
 584 samples classified as non-adherent. Table shading reflects agreement between measurements  
 585 where blue corresponds to matched classification of adherence, light blue corresponds to  
 586 discordance in adherence classification, and gray corresponds to matched classification on non-  
 587 adherence. (C) Comparison of hair MSI MVC concentration (left) and adherence assessment  
 588 (right) for on-drug samples collected from individuals at both weeks 24 and 48. Patients with  
 589 samples at both weeks ( $n=7$ ) are denoted by a colored line that is solid (male) or dashed (female).  
 590 (D) Comparison in longitudinal adherence classification (blue, adherent; gray, non-adherent)  
 591 between hair and plasma for 7 patients with both types of samples available at each visit.  
 592

| Dosing Arm                           | Study Week     |    |                  | Longitudinal<br>Samples from<br>Individual Patients |
|--------------------------------------|----------------|----|------------------|-----------------------------------------------------|
|                                      | <i>On drug</i> |    | <i>Follow-up</i> |                                                     |
|                                      | 24             | 48 | 49               |                                                     |
| <hr/> <i>Maraviroc</i>               |                |    |                  |                                                     |
| Male                                 | 2              | 2  | 2                | 2                                                   |
| Female                               | 2              | 1  | 0                | 0                                                   |
| <hr/> <i>Maraviroc+Emtricitabine</i> |                |    |                  |                                                     |
| Male                                 | 4              | 2  | 0                | 2                                                   |
| Female                               | 3              | 2  | 1                | 1                                                   |
| <hr/> <i>Maraviroc+Tenofovir</i>     |                |    |                  |                                                     |
| <i>Disoproxil Fumarate</i>           |                |    |                  |                                                     |
| Male                                 | 4              | 1  | 2                | 1                                                   |
| Female                               | 1              | 1  | 2                | 1                                                   |
| <hr/>                                |                |    |                  |                                                     |
| Total                                | 16             | 9  | 7                | 7                                                   |

593

594 **Table 1. Summary of investigated HPTN069/ACTGA5305 hair samples.**
